# Supplementary material for: Efficient catalytic direct C–H hydroxylation of benzene by graphite-supported μ-nitrido-bridged iron phthalocyanine dimer
Source: Royal Society of Chemistry journal article supplement (doi:10.1039/d4cy00661e), 2024-01-01
Supplement: d4cy00661e1.pdf [file d4cy00661e1.pdf]

**Supplementary Information for**

**Efficient Catalytic Direct C–H Hydroxylation of Benzene  
by Graphite-Supported  $\mu$ -Nitrido-Bridged  
Iron Phthalocyanine Dimer**

Yasuyuki Yamada,<sup>1,2,\*</sup> Yoshiki Uno,<sup>1</sup> Chee-Ming Teoh,<sup>1</sup> Hirotaka Ohkita,<sup>2</sup> Yuka  
Toyoda,<sup>2</sup> Akiko Sakata,<sup>2</sup> Yutaka Hitomi,<sup>3</sup> and Kentaro Tanaka<sup>1,4\*</sup>

<sup>1</sup>*Department of Chemistry, Graduate School of Science, Nagoya University, Furo-cho, Chikusa-ku,  
Nagoya 464-8602, Japan*

<sup>2</sup>*Research Center for Materials Science, Nagoya University, Furo-cho, Chikusa-ku, Nagoya 464-8602,  
Japan*

<sup>3</sup>*Department of Molecular Chemistry and Biochemistry, Graduate School of Science and Engineering,  
Doshisha University, Kyotanabe, Kyoto, 610-0321, Japan*

<sup>4</sup>*Research Institute for Quantum and Chemical Innovation, Institutes of Innovation for Future Society,  
Nagoya University, Furo-cho, Chikusa-ku, Nagoya 464-8602, Japan*

\*E-mail: yamada.yasyuki.i6@f.mail.nagoya-u.ac.jp, kentaro@chem.nagoya-u.ac.jp

## Experimental

### General

All reagents and solvents were purchased at the highest commercial quality available and used without further purification, unless otherwise stated. A graphite-supported catalyst (**1**/G) and silica gel-supported catalysts (**3**<sup>+</sup>·I<sup>-</sup>/SiO<sub>2</sub>, **1**<sup>+</sup>·I<sup>-</sup>/SiO<sub>2</sub>, and **1**/SiO<sub>2</sub>) were prepared according to our previous report.<sup>[1],[2]</sup> <sup>1</sup>H NMR spectra were recorded on a JEOL JNM-ECS400 (400 MHz for <sup>1</sup>H) or JMN-ECA600 (600 MHz for <sup>1</sup>H) spectrometers at a constant temperature of 298 K.

### Benzene oxidation reaction using CH<sub>3</sub>CN as a solvent.

Benzene oxidation was performed in a glass tube equipped with a magnetic stirring bar (PTFE). A mixture containing a solid-supported catalyst (10 mg, 49 μM as **1**, **3**<sup>+</sup>·I<sup>-</sup>, or **1**<sup>+</sup>·I<sup>-</sup>), a 500 mM CH<sub>3</sub>CN solution of benzene (1.0 mL, initial concentration of benzene in the reaction mixture: 450 mM), TFA (12 μL, 141 mM), and 35% aqueous H<sub>2</sub>O<sub>2</sub> (100 μL, initial concentration of H<sub>2</sub>O<sub>2</sub> in the reaction mixture: 1.040 M) was stirred by using a magnetic stirrer equipped with an aluminum block-based temperature control module (KPI, Model HHE-19G-US II) at a given temperature for a given reaction time. After the reaction mixture was filtered through a disposable membrane filter (ADVANTEC, DISMIC-13JP), 50 μL of the resulting filtrate was mixed with 670 μL DMSO-*d*<sub>6</sub> and 40 μL of a standard solution (20 mM 2-(trimethylsilyl)ethanol in DMSO-*d*<sub>6</sub>) for quantitative analysis using <sup>1</sup>H-NMR spectroscopy. The singlet peak assignable as the CH<sub>3</sub> moiety of 2-(trimethylsilyl)ethanol was used as the reference for calculating the concentrations of the oxidized products.

The reaction in the presence of DMPO was performed by adding the given amount of DMPO as a solid to the reaction mixture described above.

As for the oxidation of the benzene derivatives (chlorobenzene, bromobenzene, trifluoromethylbenzene, and nitrobenzene) were performed in similar manners to the method mentioned above.

(a)

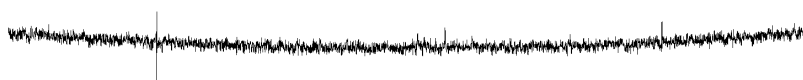

(b)

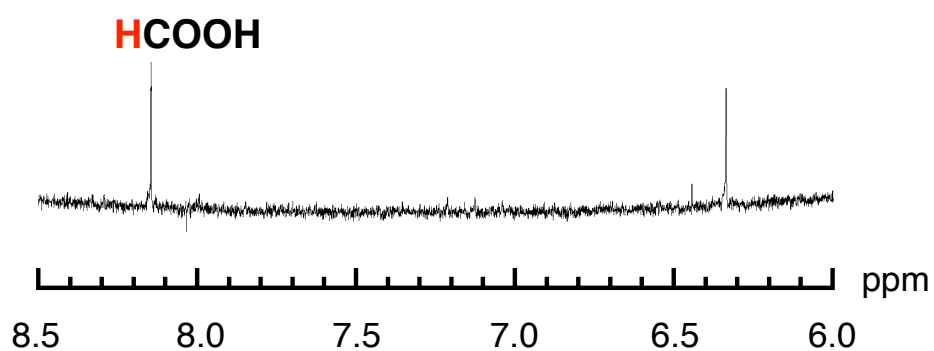

**Fig. S1.**  $^1\text{H}$ -NMR spectrum of the reaction mixtures in the absence of benzene. Mixtures containing  $\text{CH}_3\text{CN}$  (1.0 mL), TFA (12  $\mu\text{L}$ , 141 mM), and 35% aqueous  $\text{H}_2\text{O}_2$  (100  $\mu\text{L}$ , initial concentration of  $\text{H}_2\text{O}_2$  was 1.04 M) stirred at 25  $^\circ\text{C}$  for 2 h in the absence (a) and presence (b) of **1**/G (10 mg, 49  $\mu\text{M}$  as **1**).

### Benzene oxidation reaction using H<sub>2</sub>O as a solvent. (Two-phase reaction)

Benzene oxidation in H<sub>2</sub>O was performed in a glass tube equipped with a magnetic stirring bar (PTFE). A mixture containing **1**/G (10 mg, 49  $\mu$ M as **1**), benzene (50  $\mu$ L, initial concentration of benzene in the reaction mixture: 528 mM), TFA (12  $\mu$ L, 131 mM), 35% aqueous H<sub>2</sub>O<sub>2</sub> (100  $\mu$ L, initial concentration of H<sub>2</sub>O<sub>2</sub> in the reaction mixture: 993 mM), and H<sub>2</sub>O (1.0 mL) was stirred at 25  $^{\circ}$ C for 4 h by using a magnetic stirrer equipped with an aluminum block-based temperature control module (KPI, Model HHE-19G-US II). After the reaction mixture was filtered through a disposable membrane filter (ADVANTEC, DISMIC-13JP), 200  $\mu$ L of the resulting filtrate was mixed with 340  $\mu$ L DMSO-*d*<sub>6</sub> and 60  $\mu$ L of a standard solution (20 mM 2-(trimethylsilyl)ethanol in DMSO-*d*<sub>6</sub>) for quantitative analysis using <sup>1</sup>H-NMR spectroscopy.

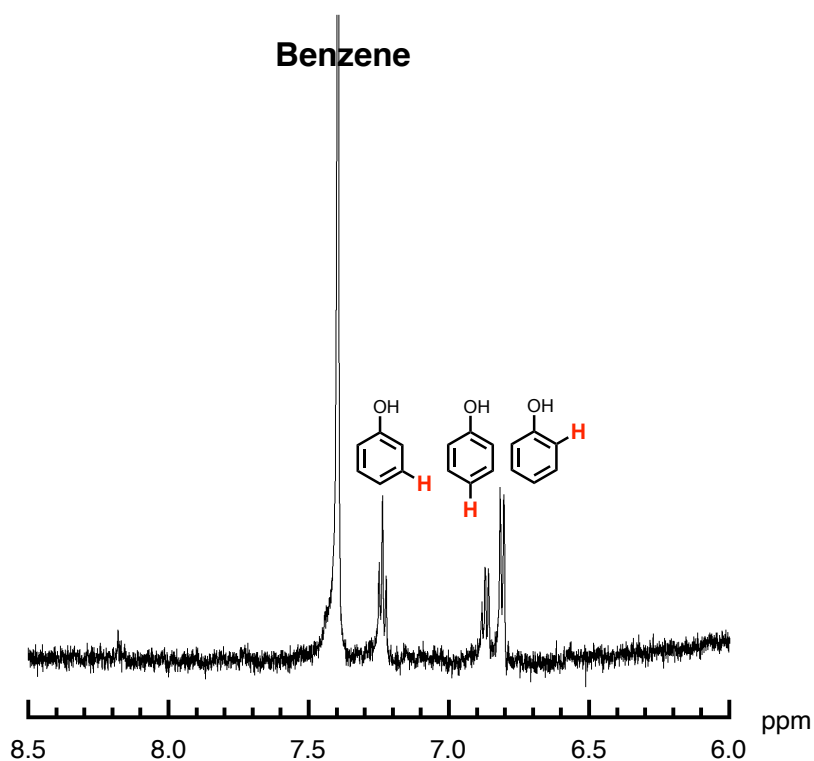

**Fig. S2.** <sup>1</sup>H-NMR spectrum of the reaction mixtures of benzene oxidation in H<sub>2</sub>O at 25  $^{\circ}$ C for 4 h. The detail of the experiment is summarized above.

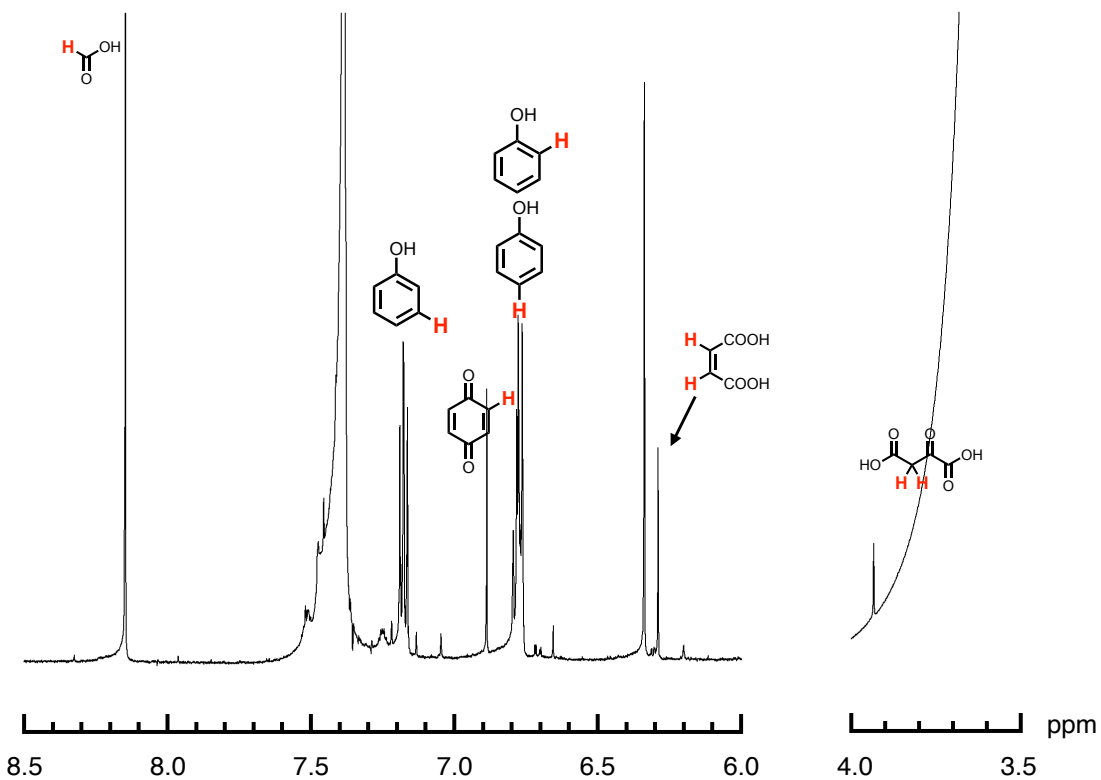

**Figure S3.**  $^1\text{H}$ -NMR spectrum of the reaction mixture of benzene oxidation by **1**/G in a  $\text{CH}_3\text{CN}$  solution containing excess  $\text{H}_2\text{O}_2$  and TFA at  $80\text{ }^\circ\text{C}$  for 2 h.

### Confirming the stability and reusability of 1/G

In order to check the stability and reusability of 1/G, we compared the benzene oxidation catalytic activity of a used 1/G with that before use.

Benzene oxidation was performed in a vial equipped with a magnetic stirring bar (PTFE). A mixture containing a 1/G (103 mg, 49  $\mu$ M as **1**), a 500 mM CH<sub>3</sub>CN solution of benzene (10 mL, initial concentration of benzene in the reaction mixture: 450 mM), TFA (120  $\mu$ L, 141 mM), and 35% aqueous H<sub>2</sub>O<sub>2</sub> (1.0 mL, initial concentration of H<sub>2</sub>O<sub>2</sub> in the reaction mixture: 1.04 M) was stirred at room temperature for 1 h. After the reaction mixture was filtered through a membrane filter (ADVANTEC, PTFE membrane filter (pore size 1.0  $\mu$ m)), the resulting solid was washed thoroughly with CH<sub>3</sub>CN (5 mL  $\times$  3), followed by drying under reduced pressure (1 mmHg) at 60 °C for 5 h to give the used 1/G (99 mg).

In a similar manner, benzene oxidation was performed by using the used 1/G. A mixture containing the used 1/G (10 mg, 49  $\mu$ M as **1**), a 500 mM CH<sub>3</sub>CN solution of benzene (1.0 mL, initial concentration of benzene in the reaction mixture: 450 mM), TFA (12  $\mu$ L, 141 mM), and 35% aqueous H<sub>2</sub>O<sub>2</sub> (100  $\mu$ L, initial concentration of H<sub>2</sub>O<sub>2</sub> in the reaction mixture: 1.04 M) was stirred at room temperature for 1 h. After the reaction mixture was filtered through a disposable membrane filter (ADVANTEC, DISMIC-13JP), 50  $\mu$ L of the resulting filtrate was mixed with 670  $\mu$ L DMSO-*d*<sub>6</sub> and 40  $\mu$ L of a standard solution (20 mM 2-(trimethylsilyl)ethanol in DMSO-*d*<sub>6</sub>) for quantitative analysis using <sup>1</sup>H-NMR spectroscopy. The singlet peak assignable as the CH<sub>3</sub> moiety of 2-(trimethylsilyl)ethanol was used as the reference for calculating the concentrations of the oxidized products.

• unused 1/G ;

[phenol] = 14.7  $\pm$  0.5 mM, [*p*-quinone] = 0.6  $\pm$  0.1 mM, TON<sub>BC</sub> (2 h) = 310  $\pm$  13

• used 1/G;

[phenol] = 14.5  $\pm$  0.3 mM, [*p*-quinone] = n.d., TON<sub>BC</sub> (2 h) = 293  $\pm$  5

## **Oxidation of benzene derivatives**

Summary of the oxidation reactions of benzene derivatives by **1**/G at 25 °C for 2 h is shown in Table 2 in the main text. In the case of benzene oxidation, almost linear increase in the BCN was observed up to 2 h. Turn over numbers of benzene derivatives (TONs) were calculated from the total concentration of the oxidized products obtained from the results of <sup>1</sup>H-NMR measurements. The <sup>1</sup>H-NMR spectra used for quantitative analyses of the oxidized compounds are shown in Figures S4–S7.

Initial reaction conditions: **1**/G (10 mg, 49 μM as **1**), a 500 mM CH<sub>3</sub>CN solution of a benzene derivative (bromobenzene, chlorobenzene, trifluoromethylbenzene, or nitrobenzene) (1.0 mL, initial concentration of a benzene derivative in the reaction mixture: 450 mM), TFA (12 μL, 141 mM), and 35% aqueous H<sub>2</sub>O<sub>2</sub> (100 μL, initial concentration of H<sub>2</sub>O<sub>2</sub> in the reaction mixture: 1.040 M).

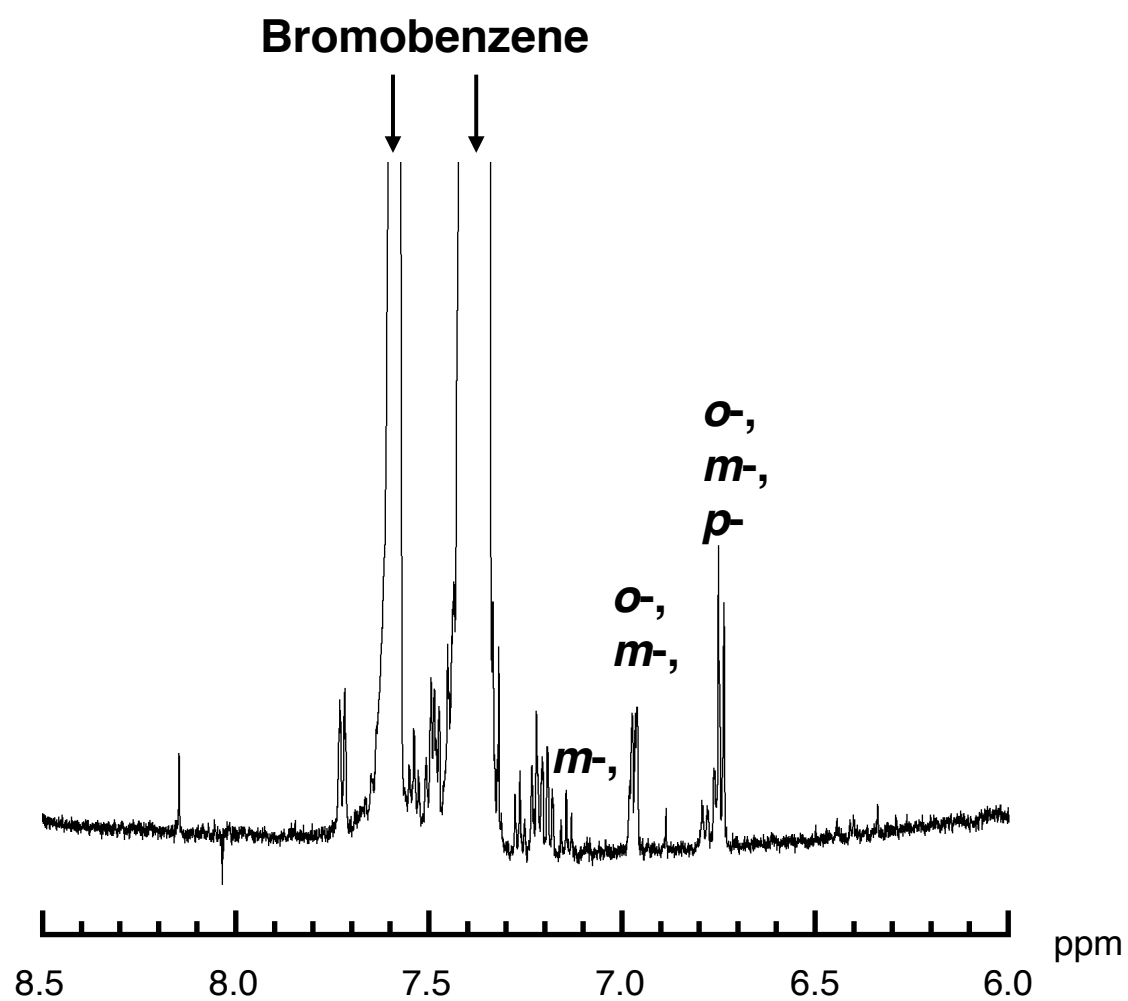

**Figure S4.** <sup>1</sup>H-NMR spectrum of the reaction mixture of bromobenzene oxidation by **1**/G in a CH<sub>3</sub>CN solution containing excess H<sub>2</sub>O<sub>2</sub> and TFA at 25 °C for 2 h.

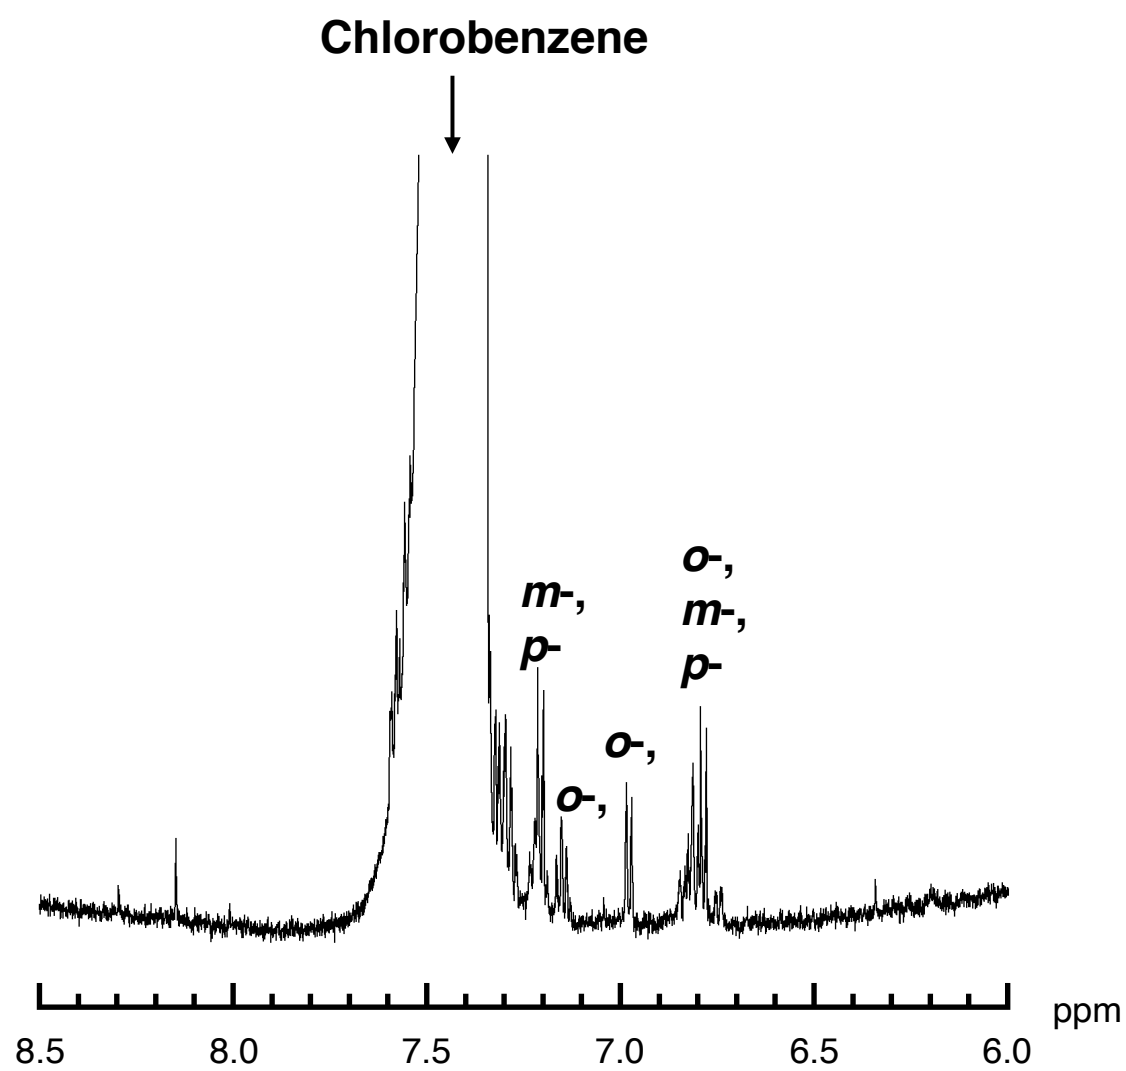

**Figure S5.** <sup>1</sup>H-NMR spectrum of the reaction mixture of chlorobenzene oxidation by **1/G** in a CH<sub>3</sub>CN solution containing excess H<sub>2</sub>O<sub>2</sub> and TFA at 25 °C for 2 h.

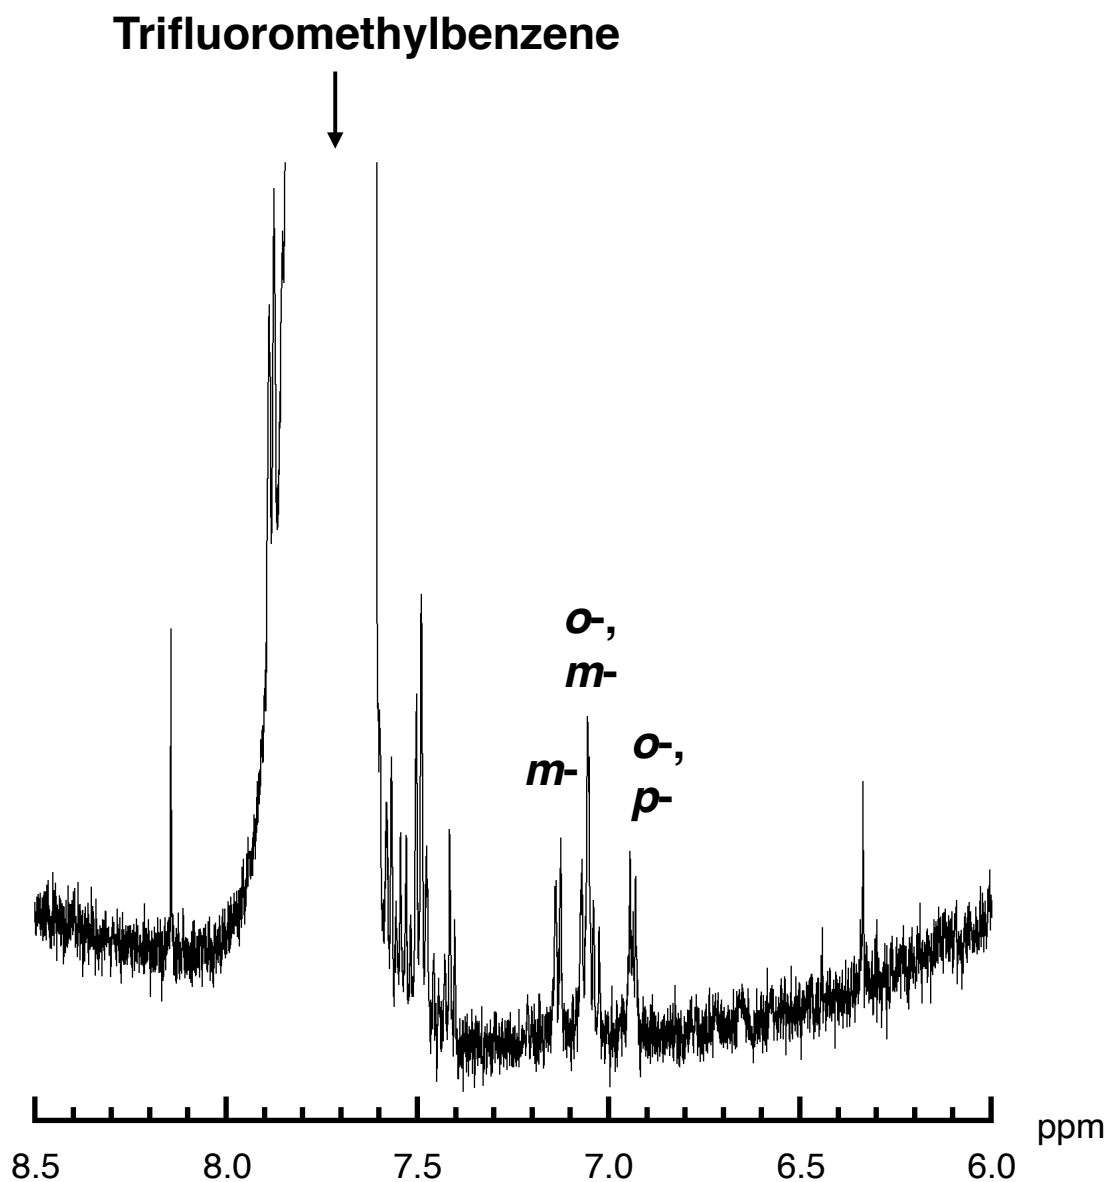

**Figure S6.**  $^1\text{H}$ -NMR spectrum of the reaction mixture of trifluoromethylbenzene oxidation by **1/G** in a  $\text{CH}_3\text{CN}$  solution containing excess  $\text{H}_2\text{O}_2$  and TFA at 25 °C for 2 h.

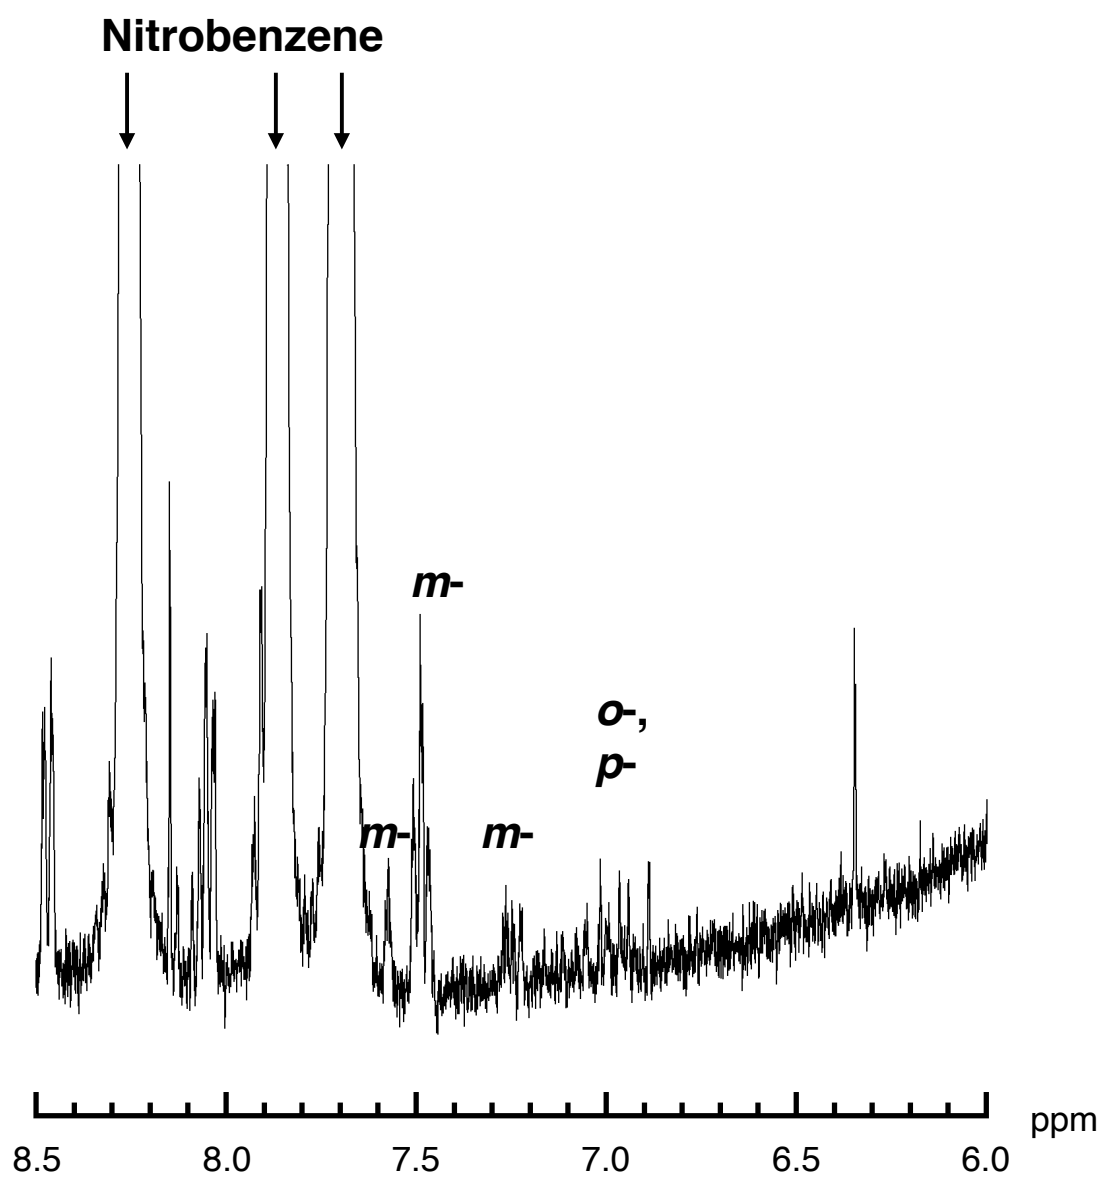

**Figure S7.**  $^1\text{H}$ -NMR spectrum of the reaction mixture of chlorobenzene oxidation by **1/G** in a  $\text{CH}_3\text{CN}$  solution containing excess  $\text{H}_2\text{O}_2$  and TFA at 25 °C for 2 h.

### Investigation of the kinetic isotope effects.

Benzene or benzene- $d_6$  oxidation was performed in a glass tube equipped with a magnetic stirring bar (PTFE). A mixture containing **1**/G (10 mg, 49  $\mu$ M as **1**), 500 mM benzene in  $\text{CH}_3\text{CN}$  (1.0 mL, initial concentration of benzene or benzene- $d_6$ : 450 mM), TFA (12  $\mu$ L, 141 mM), and 35% aqueous  $\text{H}_2\text{O}_2$  (100  $\mu$ L, initial concentration of  $\text{H}_2\text{O}_2$ : 1.040 M) was stirred by using a magnetic stirrer equipped with an aluminum block-based temperature control module (KPI, Model HHE-19G-US II) at 25  $^\circ\text{C}$  for 1 h. After the reaction mixture was filtered through a disposable membrane filter (ADVANTEC, DISMIC-13JP), the filtrate (0.10 mL) was diluted with  $\text{CH}_3\text{CN}$  (0.90 mL). The resulting solutions were analysed by GC-MS (Agilent 7890A equipped with JEOL JMS-T100GCV, detection: EI, column: Agilent DB-WAX UI, external standard: 1-chlorodecane (10  $\mu$ M), temperature conditions: initial: 60  $^\circ\text{C}$ —hold (2 min)—raise to 240  $^\circ\text{C}$  (8  $^\circ\text{C}/\text{min}$ )—hold (8 min)).

The retention times of both of  $\text{C}_6\text{H}_5\text{OH}$  and  $\text{C}_6\text{D}_5\text{OH}$  were 22.9 min. The concentrations of the corresponding phenols in the reaction mixtures were determined based on the calibration curves for  $\text{C}_6\text{H}_5\text{OH}$  or  $\text{C}_6\text{D}_5\text{OH}$ . Determination experiments of the KIE value for the benzene oxidation by **1**/G were repeated by 4 times to obtain the  $k_{\text{H}}/k_{\text{D}}$  values of 0.78, 1.28, 0.91, and 1.01.

Based on the average of the  $k_{\text{H}}/k_{\text{D}}$  values obtained above, KIE value was determined to be 1.0.

**Reference:**

- [1] Y. Yamada, J. Kura, Y. Toyoda, K. Tanaka, *Dalton Trans.*, 2021, **50**, 6718–6724.
- [2] Y. Yamada, K. Morita, T. Sugiura, Y. Toyoda, N. Mihara, M. Nagasaka, H. Takaya, K. Tanaka, T. Koitaya, N. Nakatani, H. Ariga-Miwa, S. Takakusagi, Y. Hitomi, T. Kudo, Y. Tsuji, K. Yoshizawa, K. Tanaka, *JACS Au*, 2023, **3**, 823–833.
